# Supplementary material for: Transcriptional Profiling of Hilar Nodes from Pigs after Experimental Infection with Actinobacillus Pleuropneumoniae
Source: Int J Mol Sci. 2013 Nov 29;14(12):23516–32. doi: 10.3390/ijms141223516 (PMC3876060; doi:10.3390/ijms141223516)
Supplement: Supplementary file 1 [file ijms-14-23516-s001.pdf]

# Supplementary Information

**Table S1.** The significant gene ontology biological processes in swines.

| Name         | Description                                                                    | Probe | Genes |
|--------------|--------------------------------------------------------------------------------|-------|-------|
| [GO:0019538] | protein metabolic process                                                      | 92    | 92    |
| [GO:0009058] | biosynthetic process                                                           | 80    | 80    |
| [GO:0051179] | localization                                                                   | 73    | 73    |
| [GO:0044249] | cellular biosynthetic process                                                  | 73    | 73    |
| [GO:0006810] | transport                                                                      | 70    | 70    |
| [GO:0044267] | cellular protein metabolic process                                             | 67    | 67    |
| [GO:0023052] | signaling                                                                      | 63    | 63    |
| [GO:0006807] | nitrogen compound metabolic process                                            | 58    | 58    |
| [GO:0034641] | cellular nitrogen compound metabolic process                                   | 55    | 55    |
| [GO:0023060] | signal transmission                                                            | 53    | 53    |
| [GO:0007165] | signal transduction                                                            | 51    | 51    |
| [GO:0019222] | regulation of metabolic process                                                | 50    | 50    |
| [GO:0006139] | cellular nucleobase, nucleoside, nucleotide and nucleic acid metabolic process | 48    | 48    |
| [GO:0044281] | small molecule metabolic process                                               | 48    | 48    |
| [GO:0010467] | gene expression                                                                | 48    | 48    |
| [GO:0050896] | response to stimulus                                                           | 47    | 47    |
| [GO:0080090] | regulation of primary metabolic process                                        | 46    | 46    |
| [GO:0031323] | regulation of cellular metabolic process                                       | 46    | 46    |
| [GO:0060255] | regulation of macromolecule metabolic process                                  | 46    | 46    |
| [GO:0055114] | oxidation reduction                                                            | 45    | 45    |
| [GO:0006464] | protein modification process                                                   | 44    | 44    |
| [GO:0034645] | cellular macromolecule biosynthetic process                                    | 43    | 43    |
| [GO:0009889] | regulation of biosynthetic process                                             | 42    | 42    |
| [GO:0010468] | regulation of gene expression                                                  | 42    | 42    |
| [GO:0051171] | regulation of nitrogen compound metabolic process                              | 41    | 41    |
| [GO:0009056] | catabolic process                                                              | 41    | 41    |
| [GO:0010556] | regulation of macromolecule biosynthetic process                               | 41    | 41    |
| [GO:0061019] | regulation of transcription                                                    | 40    | 40    |
| [GO:0006508] | proteolysis                                                                    | 38    | 38    |
| [GO:0043687] | post-translational protein modification                                        | 36    | 36    |
| [GO:0044248] | cellular catabolic process                                                     | 34    | 34    |
| [GO:0006355] | regulation of cellular transcription, DNA-dependent                            | 33    | 33    |
| [GO:0032502] | developmental process                                                          | 33    | 33    |
| [GO:0032501] | multicellular organismal process                                               | 33    | 33    |
| [GO:0007275] | multicellular organismal development                                           | 31    | 31    |
| [GO:0006796] | phosphate metabolic process                                                    | 31    | 31    |
| [GO:0006629] | lipid metabolic process                                                        | 30    | 30    |
| [GO:0016310] | phosphorylation                                                                | 28    | 28    |
| [GO:0016043] | cellular component organization                                                | 27    | 27    |
| [GO:0005975] | carbohydrate metabolic process                                                 | 27    | 27    |
| [GO:0006950] | response to stress                                                             | 27    | 27    |
| [GO:0061018] | transcription                                                                  | 27    | 27    |

Table S1. Cont.

| Name         | Description                                                      | Probe | Genes |
|--------------|------------------------------------------------------------------|-------|-------|
| [GO:0006811] | ion transport                                                    | 27    | 27    |
| [GO:0002376] | immune system process                                            | 26    | 26    |
| [GO:0006082] | organic acid metabolic process                                   | 26    | 26    |
| [GO:0023033] | signaling pathway                                                | 26    | 26    |
| [GO:0065008] | regulation of biological quality                                 | 25    | 25    |
| [GO:0044283] | small molecule biosynthetic process                              | 24    | 24    |
| [GO:0007242] | intracellular signaling cascade                                  | 24    | 24    |
| [GO:0006468] | protein amino acid phosphorylation                               | 23    | 23    |
| [GO:0044255] | cellular lipid metabolic process                                 | 22    | 22    |
| [GO:0006955] | immune response                                                  | 22    | 22    |
| [GO:0007166] | cell surface receptor linked signaling pathway                   | 22    | 22    |
| [GO:0048856] | anatomical structure development                                 | 21    | 21    |
| [GO:0009057] | macromolecule catabolic process                                  | 21    | 21    |
| [GO:0032787] | monocarboxylic acid metabolic process                            | 21    | 21    |
| [GO:0033036] | macromolecule localization                                       | 20    | 20    |
| [GO:0048869] | cellular developmental process                                   | 20    | 20    |
| [GO:0048731] | system development                                               | 19    | 19    |
| [GO:0006091] | generation of precursor metabolites and energy                   | 19    | 19    |
| [GO:0006812] | cation transport                                                 | 19    | 19    |
| [GO:0044265] | cellular macromolecule catabolic process                         | 18    | 18    |
| [GO:0044262] | cellular carbohydrate metabolic process                          | 18    | 18    |
| [GO:0030154] | cell differentiation                                             | 18    | 18    |
| [GO:0006996] | organelle organization                                           | 18    | 18    |
| [GO:0048518] | positive regulation of biological process                        | 18    | 18    |
| [GO:0048519] | negative regulation of biological process                        | 18    | 18    |
| [GO:0008219] | cell death                                                       | 17    | 17    |
| [GO:0048523] | negative regulation of cellular process                          | 17    | 17    |
| [GO:0006631] | fatty acid metabolic process                                     | 15    | 15    |
| [GO:0010941] | regulation of cell death                                         | 15    | 15    |
| [GO:0042592] | homeostatic process                                              | 15    | 15    |
| [GO:0012501] | programmed cell death                                            | 15    | 15    |
| [GO:0051186] | cofactor metabolic process                                       | 14    | 14    |
| [GO:0044271] | cellular nitrogen compound biosynthetic process                  | 14    | 14    |
| [GO:0030163] | protein catabolic process                                        | 14    | 14    |
| [GO:0006066] | alcohol metabolic process                                        | 14    | 14    |
| [GO:0023034] | intracellular signaling pathway                                  | 14    | 14    |
| [GO:0044257] | cellular protein catabolic process                               | 13    | 13    |
| [GO:0006952] | defense response                                                 | 13    | 13    |
| [GO:0048513] | organ development                                                | 13    | 13    |
| [GO:0030001] | metal ion transport                                              | 13    | 13    |
| [GO:0055086] | cellular nucleobase, nucleoside and nucleotide metabolic process | 12    | 12    |
| [GO:0007186] | G-protein coupled receptor protein signaling pathway             | 12    | 12    |
| [GO:0043632] | modification-dependent macromolecule catabolic process           | 11    | 11    |
| [GO:0008610] | lipid biosynthetic process                                       | 11    | 11    |

**Table S1. Cont.**

| <b>Name</b>  | <b>Description</b>                                   | <b>Probe</b> | <b>Genes</b> |
|--------------|------------------------------------------------------|--------------|--------------|
| [GO:0008104] | protein localization                                 | 11           | 11           |
| [GO:0046483] | heterocycle metabolic process                        | 11           | 11           |
| [GO:0015672] | monovalent inorganic cation transport                | 11           | 11           |
| [GO:0007155] | cell adhesion                                        | 11           | 11           |
| [GO:0048583] | regulation of response to stimulus                   | 10           | 10           |
| [GO:0044282] | small molecule catabolic process                     | 10           | 10           |
| [GO:0051716] | cellular response to stimulus                        | 10           | 10           |
| [GO:0042221] | response to chemical stimulus                        | 10           | 10           |
| [GO:0051704] | multi-organism process                               | 10           | 10           |
| [GO:0007049] | cell cycle                                           | 10           | 10           |
| [GO:0045184] | establishment of protein localization                | 10           | 10           |
| [GO:0048522] | positive regulation of cellular process              | 10           | 10           |
| [GO:0015980] | energy derivation by oxidation of organic compounds  | 10           | 10           |
| [GO:0009607] | response to biotic stimulus                          | 9            | 9            |
| [GO:0045333] | cellular respiration                                 | 9            | 9            |
| [GO:0006412] | translation                                          | 9            | 9            |
| [GO:0007264] | small GTPase mediated signal transduction            | 9            | 9            |
| [GO:0019725] | cellular homeostasis                                 | 9            | 9            |
| [GO:0046394] | carboxylic acid biosynthetic process                 | 9            | 9            |
| [GO:0009165] | nucleotide biosynthetic process                      | 9            | 9            |
| [GO:0000003] | reproduction                                         | 9            | 9            |
| [GO:0009100] | glycoprotein metabolic process                       | 8            | 8            |
| [GO:0009109] | coenzyme catabolic process                           | 8            | 8            |
| [GO:0048584] | positive regulation of response to stimulus          | 8            | 8            |
| [GO:0032879] | regulation of localization                           | 8            | 8            |
| [GO:0002682] | regulation of immune system process                  | 8            | 8            |
| [GO:0010876] | lipid localization                                   | 8            | 8            |
| [GO:0019318] | hexose metabolic process                             | 8            | 8            |
| [GO:0009308] | amine metabolic process                              | 8            | 8            |
| [GO:0022414] | reproductive process                                 | 8            | 8            |
| [GO:0008202] | steroid metabolic process                            | 8            | 8            |
| [GO:0009653] | anatomical structure morphogenesis                   | 8            | 8            |
| [GO:0019882] | antigen processing and presentation                  | 8            | 8            |
| [GO:0033554] | cellular response to stress                          | 8            | 8            |
| [GO:0009101] | glycoprotein biosynthetic process                    | 7            | 7            |
| [GO:0016042] | lipid catabolic process                              | 7            | 7            |
| [GO:0044085] | cellular component biogenesis                        | 7            | 7            |
| [GO:0002684] | positive regulation of immune system process         | 7            | 7            |
| [GO:0006633] | fatty acid biosynthetic process                      | 7            | 7            |
| [GO:0016192] | vesicle-mediated transport                           | 7            | 7            |
| [GO:0009611] | response to wounding                                 | 7            | 7            |
| [GO:0051301] | cell division                                        | 7            | 7            |
| [GO:0031325] | positive regulation of cellular metabolic process    | 7            | 7            |
| [GO:0006519] | cellular amino acid and derivative metabolic process | 7            | 7            |

Table S1. Cont.

| Name         | Description                                                 | Probe | Genes |
|--------------|-------------------------------------------------------------|-------|-------|
| [GO:0010033] | response to organic substance                               | 7     | 7     |
| [GO:0051128] | regulation of cellular component organization               | 7     | 7     |
| [GO:0006163] | purine nucleotide metabolic process                         | 7     | 7     |
| [GO:0051641] | cellular localization                                       | 7     | 7     |
| [GO:0051276] | chromosome organization                                     | 7     | 7     |
| [GO:0051173] | positive regulation of nitrogen compound metabolic process  | 6     | 6     |
| [GO:0006325] | chromatin organization                                      | 6     | 6     |
| [GO:0002526] | acute inflammatory response                                 | 6     | 6     |
| [GO:0045454] | cell redox homeostasis                                      | 6     | 6     |
| [GO:0046907] | intracellular transport                                     | 6     | 6     |
| [GO:0070887] | cellular response to chemical stimulus                      | 6     | 6     |
| [GO:0050776] | regulation of immune response                               | 6     | 6     |
| [GO:0051707] | response to other organism                                  | 6     | 6     |
| [GO:0032535] | regulation of cellular component size                       | 6     | 6     |
| [GO:0002252] | immune effector process                                     | 6     | 6     |
| [GO:0051605] | protein maturation by peptide bond cleavage                 | 6     | 6     |
| [GO:0043069] | negative regulation of programmed cell death                | 6     | 6     |
| [GO:0006820] | anion transport                                             | 6     | 6     |
| [GO:0051239] | regulation of multicellular organismal process              | 6     | 6     |
| [GO:0009260] | ribonucleotide biosynthetic process                         | 6     | 6     |
| [GO:0016070] | cellular RNA metabolic process                              | 6     | 6     |
| [GO:0065009] | regulation of molecular function                            | 6     | 6     |
| [GO:0006869] | lipid transport                                             | 6     | 6     |
| [GO:0007167] | enzyme linked receptor protein signaling pathway            | 6     | 6     |
| [GO:0008643] | carbohydrate transport                                      | 5     | 5     |
| [GO:0016051] | carbohydrate biosynthetic process                           | 5     | 5     |
| [GO:0016052] | carbohydrate catabolic process                              | 5     | 5     |
| [GO:0042127] | regulation of cell proliferation                            | 5     | 5     |
| [GO:0019953] | sexual reproduction                                         | 5     | 5     |
| [GO:0006644] | phospholipid metabolic process                              | 5     | 5     |
| [GO:0040008] | regulation of growth                                        | 5     | 5     |
| [GO:0055085] | transmembrane transport                                     | 5     | 5     |
| [GO:0007399] | nervous system development                                  | 5     | 5     |
| [GO:0050790] | regulation of catalytic activity                            | 5     | 5     |
| [GO:0050793] | regulation of developmental process                         | 5     | 5     |
| [GO:0022900] | electron transport chain                                    | 5     | 5     |
| [GO:0016568] | chromatin modification                                      | 5     | 5     |
| [GO:0007243] | protein kinase cascade                                      | 5     | 5     |
| [GO:0009888] | tissue development                                          | 5     | 5     |
| [GO:0048878] | chemical homeostasis                                        | 5     | 5     |
| [GO:0050778] | positive regulation of immune response                      | 5     | 5     |
| [GO:0010604] | positive regulation of macromolecule metabolic process      | 5     | 5     |
| [GO:0044106] | cellular amine metabolic process                            | 5     | 5     |
| [GO:0006357] | regulation of transcription from RNA polymerase II promoter | 5     | 5     |

Table S1. Cont.

| Name         | Description                                                                               | Probe | Genes |
|--------------|-------------------------------------------------------------------------------------------|-------|-------|
| [GO:0006259] | cellular DNA metabolic process                                                            | 5     | 5     |
| [GO:0016125] | sterol metabolic process                                                                  | 5     | 5     |
| [GO:0031328] | positive regulation of cellular biosynthetic process                                      | 5     | 5     |
| [GO:0006090] | pyruvate metabolic process                                                                | 5     | 5     |
| [GO:0007010] | cytoskeleton organization                                                                 | 5     | 5     |
| [GO:0006814] | sodium ion transport                                                                      | 5     | 5     |
| [GO:0009199] | ribonucleoside triphosphate metabolic process                                             | 5     | 5     |
| [GO:0051129] | negative regulation of cellular component organization                                    | 5     | 5     |
| [GO:0006694] | steroid biosynthetic process                                                              | 5     | 5     |
| [GO:0006886] | intracellular protein transport                                                           | 5     | 5     |
| [GO:0051246] | regulation of protein metabolic process                                                   | 5     | 5     |
| [GO:0016071] | mRNA metabolic process                                                                    | 5     | 5     |
| [GO:0065003] | macromolecular complex assembly                                                           | 5     | 5     |
| [GO:0006119] | oxidative phosphorylation                                                                 | 4     | 4     |
| [GO:0048646] | anatomical structure formation involved in morphogenesis                                  | 4     | 4     |
| [GO:0009108] | coenzyme biosynthetic process                                                             | 4     | 4     |
| [GO:0002520] | immune system development                                                                 | 4     | 4     |
| [GO:0034984] | cellular response to DNA damage stimulus                                                  | 4     | 4     |
| [GO:0001501] | skeletal system development                                                               | 4     | 4     |
| [GO:0009628] | response to abiotic stimulus                                                              | 4     | 4     |
| [GO:0033043] | regulation of organelle organization                                                      | 4     | 4     |
| [GO:0040007] | growth                                                                                    | 4     | 4     |
| [GO:0044087] | regulation of cellular component biogenesis                                               | 4     | 4     |
| [GO:0002504] | antigen processing and presentation of peptide or polysaccharide antigen via MHC class II | 4     | 4     |
| [GO:0008361] | regulation of cell size                                                                   | 4     | 4     |
| [GO:0006511] | ubiquitin-dependent protein catabolic process                                             | 4     | 4     |
| [GO:0006800] | oxygen and reactive oxygen species metabolic process                                      | 4     | 4     |
| [GO:0048609] | reproductive process in a multicellular organism                                          | 4     | 4     |
| [GO:0010605] | negative regulation of macromolecule metabolic process                                    | 4     | 4     |
| [GO:0008380] | RNA splicing                                                                              | 4     | 4     |
| [GO:0006725] | cellular aromatic compound metabolic process                                              | 4     | 4     |
| [GO:0051049] | regulation of transport                                                                   | 4     | 4     |
| [GO:0000087] | M phase of mitotic cell cycle                                                             | 4     | 4     |
| [GO:0008203] | cholesterol metabolic process                                                             | 4     | 4     |
| [GO:0006520] | cellular amino acid metabolic process                                                     | 4     | 4     |
| [GO:0006916] | anti-apoptosis                                                                            | 4     | 4     |
| [GO:0016126] | sterol biosynthetic process                                                               | 4     | 4     |
| [GO:0006094] | gluconeogenesis                                                                           | 4     | 4     |
| [GO:0030155] | regulation of cell adhesion                                                               | 4     | 4     |
| [GO:0006096] | glycolysis                                                                                | 4     | 4     |
| [GO:0006457] | protein folding                                                                           | 4     | 4     |
| [GO:0030258] | lipid modification                                                                        | 4     | 4     |
| [GO:0071310] | cellular response to organic substance                                                    | 4     | 4     |

**Table S1. Cont.**

| <b>Name</b>  | <b>Description</b>                                   | <b>Probe</b> | <b>Genes</b> |
|--------------|------------------------------------------------------|--------------|--------------|
| [GO:0051336] | regulation of hydrolase activity                     | 4            | 4            |
| [GO:0080134] | regulation of response to stress                     | 4            | 4            |
| [GO:0006575] | cellular amino acid derivative metabolic process     | 4            | 4            |
| [GO:0006818] | hydrogen transport                                   | 4            | 4            |
| [GO:0051726] | regulation of cell cycle                             | 4            | 4            |
| [GO:0061024] | membrane organization                                | 4            | 4            |
| [GO:0061020] | positive regulation of transcription                 | 4            | 4            |
| [GO:0015674] | di-, tri-valent inorganic cation transport           | 4            | 4            |
| [GO:0046395] | carboxylic acid catabolic process                    | 4            | 4            |
| [GO:0008284] | positive regulation of cell proliferation            | 4            | 4            |
| [GO:0034621] | cellular macromolecular complex subunit organization | 4            | 4            |
| [GO:0010646] | regulation of cell communication                     | 4            | 4            |
| [GO:0006650] | glycerophospholipid metabolic process                | 3            | 3            |
| [GO:0001503] | ossification                                         | 3            | 3            |
| [GO:0016049] | cell growth                                          | 3            | 3            |
| [GO:0009719] | response to endogenous stimulus                      | 3            | 3            |
| [GO:0048872] | homeostasis of number of cells                       | 3            | 3            |
| [GO:0009617] | response to bacterium                                | 3            | 3            |
| [GO:0045137] | development of primary sexual characteristics        | 3            | 3            |
| [GO:0009615] | response to virus                                    | 3            | 3            |
| [GO:0055082] | cellular chemical homeostasis                        | 3            | 3            |
| [GO:0009116] | nucleoside metabolic process                         | 3            | 3            |
| [GO:0006801] | superoxide metabolic process                         | 3            | 3            |
| [GO:0007610] | behavior                                             | 3            | 3            |
| [GO:0045884] | regulation of survival gene product expression       | 3            | 3            |
| [GO:0031347] | regulation of defense response                       | 3            | 3            |
| [GO:0031333] | negative regulation of protein complex assembly      | 3            | 3            |
| [GO:0007259] | JAK-STAT cascade                                     | 3            | 3            |
| [GO:0031324] | negative regulation of cellular metabolic process    | 3            | 3            |
| [GO:0032989] | cellular component morphogenesis                     | 3            | 3            |
| [GO:0005976] | polysaccharide metabolic process                     | 3            | 3            |
| [GO:0043281] | regulation of caspase activity                       | 3            | 3            |
| [GO:0048511] | rhythmic process                                     | 3            | 3            |
| [GO:0009062] | fatty acid catabolic process                         | 3            | 3            |
| [GO:0006816] | calcium ion transport                                | 3            | 3            |
| [GO:0007017] | microtubule-based process                            | 3            | 3            |
| [GO:0001568] | blood vessel development                             | 3            | 3            |
| [GO:0007346] | regulation of mitotic cell cycle                     | 3            | 3            |
| [GO:0042325] | regulation of phosphorylation                        | 3            | 3            |
| [GO:0006790] | sulfur metabolic process                             | 3            | 3            |
| [GO:0006695] | cholesterol biosynthetic process                     | 3            | 3            |
| [GO:0019221] | cytokine-mediated signaling pathway                  | 3            | 3            |
| [GO:0001558] | regulation of cell growth                            | 3            | 3            |

**Table S1.** *Cont.*

| Name         | Description                                                              | Probe | Genes |
|--------------|--------------------------------------------------------------------------|-------|-------|
| [GO:0007178] | transmembrane receptor protein serine/threonine kinase signaling pathway | 3     | 3     |
| [GO:0006979] | response to oxidative stress                                             | 3     | 3     |
| [GO:0045927] | positive regulation of growth                                            | 3     | 3     |
| [GO:0015985] | energy coupled proton transport, down electrochemical gradient           | 3     | 3     |
| [GO:0019216] | regulation of lipid metabolic process                                    | 3     | 3     |
| [GO:0006897] | endocytosis                                                              | 3     | 3     |
| [GO:0007154] | cell communication                                                       | 3     | 3     |
| [GO:0006470] | protein amino acid dephosphorylation                                     | 3     | 3     |
| [GO:0045944] | positive regulation of transcription from RNA polymerase II promoter     | 3     | 3     |
| [GO:0006461] | protein complex assembly                                                 | 3     | 3     |
| [GO:0007169] | transmembrane receptor protein tyrosine kinase signaling pathway         | 3     | 3     |
| [GO:0051270] | regulation of cellular component movement                                | 3     | 3     |

**Table S2.** The significant gene ontology cellular components in swines.

| Name         | Description                          | Probe | Genes |
|--------------|--------------------------------------|-------|-------|
| [GO:0044422] | organelle part                       | 69    | 69    |
| [GO:0005634] | nucleus                              | 68    | 68    |
| [GO:0044446] | intracellular organelle part         | 68    | 68    |
| [GO:0032991] | macromolecular complex               | 62    | 62    |
| [GO:0005886] | plasma membrane                      | 60    | 60    |
| [GO:0005576] | extracellular region                 | 52    | 52    |
| [GO:0043234] | protein complex                      | 49    | 49    |
| [GO:0005739] | mitochondrion                        | 36    | 36    |
| [GO:0005783] | endoplasmic reticulum                | 34    | 34    |
| [GO:0043228] | non-membrane-bounded organelle       | 32    | 32    |
| [GO:0044459] | plasma membrane part                 | 30    | 30    |
| [GO:0031090] | organelle membrane                   | 30    | 30    |
| [GO:0005794] | Golgi apparatus                      | 28    | 28    |
| [GO:0044429] | mitochondrial part                   | 23    | 23    |
| [GO:0044421] | extracellular region part            | 22    | 22    |
| [GO:0031974] | membrane-enclosed lumen              | 21    | 21    |
| [GO:0005856] | cytoskeleton                         | 20    | 20    |
| [GO:0012505] | endomembrane system                  | 17    | 17    |
| [GO:0031975] | envelope                             | 17    | 17    |
| [GO:0031982] | vesicle                              | 15    | 15    |
| [GO:0044430] | cytoskeletal part                    | 14    | 14    |
| [GO:0044428] | nuclear part                         | 14    | 14    |
| [GO:0016023] | cytoplasmic membrane-bounded vesicle | 13    | 13    |
| [GO:0005740] | mitochondrial envelope               | 13    | 13    |
| [GO:0005829] | cytosol                              | 12    | 12    |
| [GO:0031966] | mitochondrial membrane               | 12    | 12    |
| [GO:0071212] | subs synaptic reticulum              | 11    | 11    |
| [GO:0005759] | mitochondrial matrix                 | 11    | 11    |

Table S2. Cont.

| Name         | Description                                   | Probe | Genes |
|--------------|-----------------------------------------------|-------|-------|
| [GO:0019898] | extrinsic to membrane                         | 10    | 10    |
| [GO:0015630] | microtubule cytoskeleton                      | 10    | 10    |
| [GO:0031012] | extracellular matrix                          | 10    | 10    |
| [GO:0030529] | ribonucleoprotein complex                     | 10    | 10    |
| [GO:0005773] | vacuole                                       | 9     | 9     |
| [GO:0005578] | proteinaceous extracellular matrix            | 9     | 9     |
| [GO:0009898] | internal side of plasma membrane              | 9     | 9     |
| [GO:0005792] | microsome                                     | 8     | 8     |
| [GO:0048770] | pigment granule                               | 8     | 8     |
| [GO:0005764] | lysosome                                      | 8     | 8     |
| [GO:0044432] | endoplasmic reticulum part                    | 8     | 8     |
| [GO:0044431] | Golgi apparatus part                          | 8     | 8     |
| [GO:0031981] | nuclear lumen                                 | 8     | 8     |
| [GO:0042611] | MHC protein complex                           | 7     | 7     |
| [GO:0005840] | ribosome                                      | 7     | 7     |
| [GO:0000502] | proteasome complex                            | 7     | 7     |
| [GO:0005743] | mitochondrial inner membrane                  | 7     | 7     |
| [GO:0000139] | Golgi membrane                                | 7     | 7     |
| [GO:0005789] | endoplasmic reticulum membrane                | 6     | 6     |
| [GO:0031225] | anchored to membrane                          | 6     | 6     |
| [GO:0005654] | nucleoplasm                                   | 6     | 6     |
| [GO:0005874] | microtubule                                   | 6     | 6     |
| [GO:0005819] | spindle                                       | 5     | 5     |
| [GO:0042613] | MHC class II protein complex                  | 5     | 5     |
| [GO:0031968] | organelle outer membrane                      | 5     | 5     |
| [GO:0044451] | nucleoplasm part                              | 5     | 5     |
| [GO:0031300] | intrinsic to organelle membrane               | 4     | 4     |
| [GO:0005887] | integral to plasma membrane                   | 4     | 4     |
| [GO:0005635] | nuclear envelope                              | 4     | 4     |
| [GO:0005911] | cell-cell junction                            | 4     | 4     |
| [GO:0005777] | peroxisome                                    | 4     | 4     |
| [GO:0005768] | endosome                                      | 4     | 4     |
| [GO:0046930] | pore complex                                  | 4     | 4     |
| [GO:0015629] | actin cytoskeleton                            | 4     | 4     |
| [GO:0016469] | proton-transporting two-sector ATPase complex | 4     | 4     |
| [GO:0005694] | chromosome                                    | 3     | 3     |
| [GO:0031301] | integral to organelle membrane                | 3     | 3     |
| [GO:0048471] | perinuclear region of cytoplasm               | 3     | 3     |
| [GO:0043292] | contractile fiber                             | 3     | 3     |
| [GO:0045202] | synapse                                       | 3     | 3     |
| [GO:0031965] | nuclear membrane                              | 3     | 3     |
| [GO:0016323] | basolateral plasma membrane                   | 3     | 3     |
| [GO:0005681] | spliceosomal complex                          | 3     | 3     |
| [GO:0033176] | proton-transporting V-type ATPase complex     | 3     | 3     |
| [GO:0005730] | nucleolus                                     | 3     | 3     |
| [GO:0016604] | nuclear body                                  | 3     | 3     |
| [GO:0022624] | proteasome accessory complex                  | 3     | 3     |

**Table S3.** The significant gene ontology molecular functions in swines.

| Name         | Description                                                     | Probe | Genes |
|--------------|-----------------------------------------------------------------|-------|-------|
| [GO:0000166] | nucleotide binding                                              | 96    | 96    |
| [GO:0017076] | purine nucleotide binding                                       | 78    | 78    |
| [GO:0016787] | hydrolase activity                                              | 73    | 73    |
| [GO:0046914] | transition metal ion binding                                    | 70    | 70    |
| [GO:0032555] | purine ribonucleotide binding                                   | 70    | 70    |
| [GO:0016740] | transferase activity                                            | 68    | 68    |
| [GO:0030554] | adenyl nucleotide binding                                       | 61    | 61    |
| [GO:0003676] | nucleic acid binding                                            | 56    | 56    |
| [GO:0032559] | adenyl ribonucleotide binding                                   | 53    | 53    |
| [GO:0005524] | ATP binding                                                     | 52    | 52    |
| [GO:0016491] | oxidoreductase activity                                         | 50    | 50    |
| [GO:0005215] | transporter activity                                            | 50    | 50    |
| [GO:0060089] | molecular transducer activity                                   | 49    | 49    |
| [GO:0008270] | zinc ion binding                                                | 43    | 43    |
| [GO:0022892] | substrate-specific transporter activity                         | 39    | 39    |
| [GO:0004872] | receptor activity                                               | 37    | 37    |
| [GO:0022857] | transmembrane transporter activity                              | 35    | 35    |
| [GO:0030528] | transcription regulator activity                                | 34    | 34    |
| [GO:0016772] | transferase activity, transferring phosphorus-containing groups | 34    | 34    |
| [GO:0003677] | DNA binding                                                     | 34    | 34    |
| [GO:0022891] | substrate-specific transmembrane transporter activity           | 33    | 33    |
| [GO:0016301] | kinase activity                                                 | 30    | 30    |
| [GO:0015075] | ion transmembrane transporter activity                          | 30    | 30    |
| [GO:0008233] | peptidase activity                                              | 29    | 29    |
| [GO:0016773] | phosphotransferase activity, alcohol group as acceptor          | 27    | 27    |
| [GO:0005102] | receptor binding                                                | 26    | 26    |
| [GO:0070011] | peptidase activity, acting on L-amino acid peptides             | 25    | 25    |
| [GO:0048037] | cofactor binding                                                | 25    | 25    |
| [GO:0003700] | transcription factor activity                                   | 25    | 25    |
| [GO:0004672] | protein kinase activity                                         | 24    | 24    |
| [GO:0004175] | endopeptidase activity                                          | 22    | 22    |
| [GO:0008324] | cation transmembrane transporter activity                       | 21    | 21    |
| [GO:0005509] | calcium ion binding                                             | 21    | 21    |
| [GO:0005506] | iron ion binding                                                | 21    | 21    |
| [GO:0050662] | coenzyme binding                                                | 20    | 20    |
| [GO:0030234] | enzyme regulator activity                                       | 19    | 19    |
| [GO:0019001] | guanyl nucleotide binding                                       | 18    | 18    |
| [GO:0016788] | hydrolase activity, acting on ester bonds                       | 16    | 16    |
| [GO:0009055] | electron carrier activity                                       | 16    | 16    |
| [GO:0004888] | transmembrane receptor activity                                 | 16    | 16    |
| [GO:0016817] | hydrolase activity, acting on acid anhydrides                   | 15    | 15    |
| [GO:0005198] | structural molecule activity                                    | 15    | 15    |
| [GO:0004857] | enzyme inhibitor activity                                       | 15    | 15    |
| [GO:0004674] | protein serine/threonine kinase activity                        | 15    | 15    |
| [GO:0022890] | inorganic cation transmembrane transporter activity             | 14    | 14    |

Table S3. Cont.

| Name         | Description                                                                                           | Probe | Genes |
|--------------|-------------------------------------------------------------------------------------------------------|-------|-------|
| [GO:0000287] | magnesium ion binding                                                                                 | 14    | 14    |
| [GO:0022804] | active transmembrane transporter activity                                                             | 13    | 13    |
| [GO:0008092] | cytoskeletal protein binding                                                                          | 13    | 13    |
| [GO:0030414] | peptidase inhibitor activity                                                                          | 12    | 12    |
| [GO:0016757] | transferase activity, transferring glycosyl groups                                                    | 12    | 12    |
| [GO:0043565] | sequence-specific DNA binding                                                                         | 11    | 11    |
| [GO:0017171] | serine hydrolase activity                                                                             | 11    | 11    |
| [GO:0016746] | transferase activity, transferring acyl groups                                                        | 11    | 11    |
| [GO:0016614] | oxidoreductase activity, acting on CH-OH group of donors                                              | 11    | 11    |
| [GO:0016874] | ligase activity                                                                                       | 10    | 10    |
| [GO:0016705] | oxidoreductase activity, acting on paired donors, with incorporation or reduction of molecular oxygen | 10    | 10    |
| [GO:0046906] | tetrapyrrole binding                                                                                  | 9     | 9     |
| [GO:0016887] | ATPase activity                                                                                       | 9     | 9     |
| [GO:0008289] | lipid binding                                                                                         | 9     | 9     |
| [GO:0008234] | cysteine-type peptidase activity                                                                      | 9     | 9     |
| [GO:0004930] | G-protein coupled receptor activity                                                                   | 9     | 9     |
| [GO:0050660] | FAD binding                                                                                           | 8     | 8     |
| [GO:0046873] | metal ion transmembrane transporter activity                                                          | 8     | 8     |
| [GO:0042623] | ATPase activity, coupled                                                                              | 8     | 8     |
| [GO:0042578] | phosphoric ester hydrolase activity                                                                   | 8     | 8     |
| [GO:0022838] | substrate-specific channel activity                                                                   | 8     | 8     |
| [GO:0020037] | heme binding                                                                                          | 8     | 8     |
| [GO:0019842] | vitamin binding                                                                                       | 8     | 8     |
| [GO:0016747] | transferase activity, transferring acyl groups other than amino-acyl groups                           | 8     | 8     |
| [GO:0015078] | hydrogen ion transmembrane transporter activity                                                       | 8     | 8     |
| [GO:0005125] | cytokine activity                                                                                     | 8     | 8     |
| [GO:0004197] | cysteine-type endopeptidase activity                                                                  | 8     | 8     |
| [GO:0003723] | RNA binding                                                                                           | 8     | 8     |
| [GO:0051287] | NAD or NADH binding                                                                                   | 7     | 7     |
| [GO:0046983] | protein dimerization activity                                                                         | 7     | 7     |
| [GO:0030246] | carbohydrate binding                                                                                  | 7     | 7     |
| [GO:0016791] | phosphatase activity                                                                                  | 7     | 7     |
| [GO:0016758] | transferase activity, transferring hexosyl groups                                                     | 7     | 7     |
| [GO:0015291] | secondary active transmembrane transporter activity                                                   | 7     | 7     |
| [GO:0008083] | growth factor activity                                                                                | 7     | 7     |
| [GO:0005126] | cytokine receptor binding                                                                             | 7     | 7     |
| [GO:0004713] | protein tyrosine kinase activity                                                                      | 7     | 7     |
| [GO:0003779] | actin binding                                                                                         | 7     | 7     |
| [GO:0003735] | structural constituent of ribosome                                                                    | 7     | 7     |
| [GO:0031406] | carboxylic acid binding                                                                               | 6     | 6     |
| [GO:0030145] | manganese ion binding                                                                                 | 6     | 6     |
| [GO:0022836] | gated channel activity                                                                                | 6     | 6     |
| [GO:0016879] | ligase activity, forming carbon-nitrogen bonds                                                        | 6     | 6     |

Table S3. Cont.

| Name         | Description                                                                                                                                                                      | Probe | Genes |
|--------------|----------------------------------------------------------------------------------------------------------------------------------------------------------------------------------|-------|-------|
| [GO:0016810] | hydrolase activity, acting on carbon-nitrogen (but not peptide) bonds                                                                                                            | 6     | 6     |
| [GO:0016209] | antioxidant activity                                                                                                                                                             | 6     | 6     |
| [GO:0008509] | anion transmembrane transporter activity                                                                                                                                         | 6     | 6     |
| [GO:0008430] | selenium binding                                                                                                                                                                 | 6     | 6     |
| [GO:0004721] | phosphoprotein phosphatase activity                                                                                                                                              | 6     | 6     |
| [GO:0004497] | monooxygenase activity                                                                                                                                                           | 6     | 6     |
| [GO:0050661] | NADP or NADPH binding                                                                                                                                                            | 5     | 5     |
| [GO:0042626] | ATPase activity, coupled to transmembrane movement of substances                                                                                                                 | 5     | 5     |
| [GO:0031420] | alkali metal ion binding                                                                                                                                                         | 5     | 5     |
| [GO:0019904] | protein domain specific binding                                                                                                                                                  | 5     | 5     |
| [GO:0016853] | isomerase activity                                                                                                                                                               | 5     | 5     |
| [GO:0016811] | hydrolase activity, acting on carbon-nitrogen (but not peptide) bonds,<br>in linear amides                                                                                       | 5     | 5     |
| [GO:0016798] | hydrolase activity, acting on glycosyl bonds                                                                                                                                     | 5     | 5     |
| [GO:0016779] | nucleotidyltransferase activity                                                                                                                                                  | 5     | 5     |
| [GO:0016563] | transcription activator activity                                                                                                                                                 | 5     | 5     |
| [GO:0015293] | symporter activity                                                                                                                                                               | 5     | 5     |
| [GO:0015082] | di-, tri-valent inorganic cation transmembrane transporter activity                                                                                                              | 5     | 5     |
| [GO:0005507] | copper ion binding                                                                                                                                                               | 5     | 5     |
| [GO:0004867] | serine-type endopeptidase inhibitor activity                                                                                                                                     | 5     | 5     |
| [GO:0070403] | NAD binding                                                                                                                                                                      | 4     | 4     |
| [GO:0070279] | vitamin B6 binding                                                                                                                                                               | 4     | 4     |
| [GO:0051540] | metal cluster binding                                                                                                                                                            | 4     | 4     |
| [GO:0046915] | transition metal ion transmembrane transporter activity                                                                                                                          | 4     | 4     |
| [GO:0042625] | ATPase activity, coupled to transmembrane movement of ions                                                                                                                       | 4     | 4     |
| [GO:0019955] | cytokine binding                                                                                                                                                                 | 4     | 4     |
| [GO:0019899] | enzyme binding                                                                                                                                                                   | 4     | 4     |
| [GO:0019199] | transmembrane receptor protein kinase activity                                                                                                                                   | 4     | 4     |
| [GO:0016881] | acid-amino acid ligase activity                                                                                                                                                  | 4     | 4     |
| [GO:0016860] | intramolecular oxidoreductase activity                                                                                                                                           | 4     | 4     |
| [GO:0016741] | transferase activity, transferring one-carbon groups                                                                                                                             | 4     | 4     |
| [GO:0016709] | oxidoreductase activity, acting on paired donors, with incorporation<br>or reduction of molecular oxygen, NADH or NADPH as one donor,<br>and incorporation of one atom of oxygen | 4     | 4     |
| [GO:0016684] | oxidoreductase activity, acting on peroxide as acceptor                                                                                                                          | 4     | 4     |
| [GO:0016627] | oxidoreductase activity, acting on the CH-CH group of donors                                                                                                                     | 4     | 4     |
| [GO:0015631] | tubulin binding                                                                                                                                                                  | 4     | 4     |
| [GO:0008134] | transcription factor binding                                                                                                                                                     | 4     | 4     |
| [GO:0005529] | sugar binding                                                                                                                                                                    | 4     | 4     |
| [GO:0005516] | calmodulin binding                                                                                                                                                               | 4     | 4     |
| [GO:0005253] | anion channel activity                                                                                                                                                           | 4     | 4     |
| [GO:0004869] | cysteine-type endopeptidase inhibitor activity                                                                                                                                   | 4     | 4     |
| [GO:0004386] | helicase activity                                                                                                                                                                | 4     | 4     |
| [GO:0004091] | carboxylesterase activity                                                                                                                                                        | 4     | 4     |
| [GO:0001664] | G-protein-coupled receptor binding                                                                                                                                               | 4     | 4     |

Table S3. Cont.

| Name         | Description                                                                                                                                                                                 | Probe | Genes |
|--------------|---------------------------------------------------------------------------------------------------------------------------------------------------------------------------------------------|-------|-------|
| [GO:0060589] | nucleoside-triphosphatase regulator activity                                                                                                                                                | 3     | 3     |
| [GO:0051427] | hormone receptor binding                                                                                                                                                                    | 3     | 3     |
| [GO:0046943] | carboxylic acid transmembrane transporter activity                                                                                                                                          | 3     | 3     |
| [GO:0046912] | transferase activity, transferring acyl groups, acyl groups converted into alkyl on transfer                                                                                                | 3     | 3     |
| [GO:0042803] | protein homodimerization activity                                                                                                                                                           | 3     | 3     |
| [GO:0031402] | sodium ion binding                                                                                                                                                                          | 3     | 3     |
| [GO:0022843] | voltage-gated cation channel activity                                                                                                                                                       | 3     | 3     |
| [GO:0019838] | growth factor binding                                                                                                                                                                       | 3     | 3     |
| [GO:0019829] | cation-transporting ATPase activity                                                                                                                                                         | 3     | 3     |
| [GO:0019787] | small conjugating protein ligase activity                                                                                                                                                   | 3     | 3     |
| [GO:0016829] | lyase activity                                                                                                                                                                              | 3     | 3     |
| [GO:0016790] | thiolester hydrolase activity                                                                                                                                                               | 3     | 3     |
| [GO:0016769] | transferase activity, transferring nitrogenous groups                                                                                                                                       | 3     | 3     |
| [GO:0016712] | oxidoreductase activity, acting on paired donors, with incorporation or reduction of molecular oxygen, reduced flavin or flavoprotein as one donor, and incorporation of one atom of oxygen | 3     | 3     |
| [GO:0016702] | oxidoreductase activity, acting on single donors with incorporation of molecular oxygen, incorporation of two atoms of oxygen                                                               | 3     | 3     |
| [GO:0016675] | oxidoreductase activity, acting on heme group of donors                                                                                                                                     | 3     | 3     |
| [GO:0016667] | oxidoreductase activity, acting on sulfur group of donors                                                                                                                                   | 3     | 3     |
| [GO:0016651] | oxidoreductase activity, acting on NADH or NADPH                                                                                                                                            | 3     | 3     |
| [GO:0016407] | acetyltransferase activity                                                                                                                                                                  | 3     | 3     |
| [GO:0016298] | lipase activity                                                                                                                                                                             | 3     | 3     |
| [GO:0015929] | hexosaminidase activity                                                                                                                                                                     | 3     | 3     |
| [GO:0015294] | solute:cation symporter activity                                                                                                                                                            | 3     | 3     |
| [GO:0015144] | carbohydrate transmembrane transporter activity                                                                                                                                             | 3     | 3     |
| [GO:0010860] | proteasome regulator activity                                                                                                                                                               | 3     | 3     |
| [GO:0008565] | protein transporter activity                                                                                                                                                                | 3     | 3     |
| [GO:0008528] | peptide receptor activity, G-protein coupled                                                                                                                                                | 3     | 3     |
| [GO:0008308] | voltage-gated anion channel activity                                                                                                                                                        | 3     | 3     |
| [GO:0008170] | N-methyltransferase activity                                                                                                                                                                | 3     | 3     |
| [GO:0008026] | ATP-dependent helicase activity                                                                                                                                                             | 3     | 3     |
| [GO:0008009] | chemokine activity                                                                                                                                                                          | 3     | 3     |
| [GO:0005539] | glycosaminoglycan binding                                                                                                                                                                   | 3     | 3     |
| [GO:0005385] | zinc ion transmembrane transporter activity                                                                                                                                                 | 3     | 3     |
| [GO:0005179] | hormone activity                                                                                                                                                                            | 3     | 3     |
| [GO:0004879] | ligand-dependent nuclear receptor activity                                                                                                                                                  | 3     | 3     |
| [GO:0004725] | protein tyrosine phosphatase activity                                                                                                                                                       | 3     | 3     |
| [GO:0004715] | non-membrane spanning protein tyrosine kinase activity                                                                                                                                      | 3     | 3     |
| [GO:0004576] | oligosaccharyl transferase activity                                                                                                                                                         | 3     | 3     |
| [GO:0004198] | calcium-dependent cysteine-type endopeptidase activity                                                                                                                                      | 3     | 3     |
| [GO:0003995] | acyl-CoA dehydrogenase activity                                                                                                                                                             | 3     | 3     |
| [GO:0003743] | translation initiation factor activity                                                                                                                                                      | 3     | 3     |
| [GO:0003712] | transcription cofactor activity                                                                                                                                                             | 3     | 3     |

**Table S4.** Pathways enriched in phenotype TG.

| Pathway                                              | Size | ES    | NES   | NOM<br><i>p</i> -val | FDR<br><i>q</i> -val | FWER<br><i>p</i> -val | Rank<br>At Max | Leading Edge                          |
|------------------------------------------------------|------|-------|-------|----------------------|----------------------|-----------------------|----------------|---------------------------------------|
| ssc04370:VEGF signaling pathway                      | 6    | −0.76 | −1.62 | 0.009                | 1                    | 0.774                 | 46             | tags = 67%, list = 13%, signal = 76%  |
| ssc04722:Neurotrophin signaling pathway              | 5    | −0.74 | −1.54 | 0.029                | 1                    | 0.95                  | 49             | tags = 60%, list = 14%, signal = 69%  |
| ssc04610:Complement and coagulation cascades         | 9    | −0.61 | −1.5  | 0.054                | 1                    | 0.981                 | 24             | tags = 44%, list = 7%, signal = 47%   |
| ssc04660:T cell receptor signaling pathway           | 14   | −0.53 | −1.46 | 0.072                | 1                    | 0.995                 | 134            | tags = 79%, list = 39%, signal = 123% |
| ssc00410:beta-Alanine metabolism                     | 5    | −0.68 | −1.4  | 0.09                 | 1                    | 1                     | 22             | tags = 40%, list = 6%, signal = 42%   |
| ssc05216:Thyroid cancer                              | 6    | −0.63 | −1.39 | 0.118                | 1                    | 1                     | 35             | tags = 33%, list = 10%, signal = 36%  |
| ssc04810:Regulation of actin cytoskeleton            | 16   | −0.48 | −1.38 | 0.123                | 1                    | 1                     | 48             | tags = 31%, list = 14%, signal = 35%  |
| ssc04012:ErbB signaling pathway                      | 16   | −0.49 | −1.37 | 0.105                | 1                    | 1                     | 17             | tags = 19%, list = 5%, signal = 19%   |
| ssc04330:Notch signaling pathway                     | 5    | −0.67 | −1.37 | 0.108                | 1                    | 1                     | 61             | tags = 60%, list = 18%, signal = 72%  |
| ssc04080:Neuroactive ligand-receptor interaction     | 9    | −0.55 | −1.36 | 0.133                | 1                    | 1                     | 20             | tags = 33%, list = 6%, signal = 34%   |
| ssc00520:Amino sugar and nucleotide sugar metabolism | 5    | −0.65 | −1.34 | 0.124                | 1                    | 1                     | 60             | tags = 60%, list = 17%, signal = 72%  |
| ssc04730:Long-term depression                        | 18   | −0.45 | −1.34 | 0.132                | 1                    | 1                     | 77             | tags = 44%, list = 22%, signal = 54%  |
| ssc00640:Propanoate metabolism                       | 9    | −0.54 | −1.32 | 0.155                | 1                    | 1                     | 42             | tags = 33%, list = 12%, signal = 37%  |
| ssc04664:Fc epsilon RI signaling pathway             | 8    | −0.56 | −1.31 | 0.144                | 1                    | 1                     | 132            | tags = 75%, list = 38%, signal = 119% |
| ssc04912:GnRH signaling pathway                      | 6    | −0.61 | −1.31 | 0.148                | 1                    | 1                     | 49             | tags = 50%, list = 14%, signal = 57%  |
| ssc04662:B cell receptor signaling pathway           | 12   | −0.48 | −1.3  | 0.18                 | 1                    | 1                     | 134            | tags = 67%, list = 39%, signal = 105% |
| ssc00650:Butanoate metabolism                        | 6    | −0.6  | −1.29 | 0.181                | 1                    | 1                     | 121            | tags = 83%, list = 35%, signal = 126% |
| ssc04621:NOD-like receptor signaling pathway         | 12   | −0.49 | −1.29 | 0.166                | 0.95                 | 1                     | 145            | tags = 75%, list = 42%, signal = 125% |
| ssc00310:Lysine degradation                          | 6    | −0.59 | −1.28 | 0.168                | 0.945                | 1                     | 122            | tags = 83%, list = 35%, signal = 127% |
| ssc05211:Renal cell carcinoma                        | 8    | −0.54 | −1.27 | 0.188                | 0.927                | 1                     | 132            | tags = 75%, list = 38%, signal = 119% |
| ssc05221:Acute myeloid leukemia                      | 14   | −0.47 | −1.27 | 0.175                | 0.904                | 1                     | 132            | tags = 71%, list = 38%, signal = 111% |

Table S4. Cont.

| Pathway                                                     | Size | ES    | NES   | NOM<br><i>p</i> -val | FDR<br><i>q</i> -val | FWER<br><i>p</i> -val | Rank<br>At Max | Leading Edge                              |
|-------------------------------------------------------------|------|-------|-------|----------------------|----------------------|-----------------------|----------------|-------------------------------------------|
| ssc05212:Pancreatic cancer                                  | 16   | −0.45 | −1.27 | 0.207                | 0.874                | 1                     | 113            | tags = 63%, list = 33%,<br>signal = 89%   |
| ssc04270:Vascular smooth<br>muscle contraction              | 3    | −0.71 | −1.24 | 0.197                | 0.927                | 1                     | 49             | tags = 67%, list = 14%,<br>signal = 77%   |
| ssc00053:Ascorbate and<br>aldarate metabolism               | 2    | −0.77 | −1.22 | 0.218                | 0.974                | 1                     | 8              | tags = 50%, list = 2%,<br>signal = 51%    |
| ssc05222:Small cell lung<br>cancer                          | 15   | −0.44 | −1.21 | 0.223                | 0.975                | 1                     | 105            | tags = 53%, list = 31%,<br>signal = 73%   |
| ssc04020:Calcium signaling<br>pathway                       | 19   | −0.4  | −1.21 | 0.244                | 0.94                 | 1                     | 52             | tags = 26%, list = 15%,<br>signal = 29%   |
| ssc00260:Glycine, serine<br>and threonine metabolism        | 2    | −0.76 | −1.21 | 0.193                | 0.917                | 1                     | 85             | tags = 100%, list = 25%,<br>signal = 132% |
| ssc00620:Pyruvate<br>metabolism                             | 7    | −0.54 | −1.21 | 0.24                 | 0.885                | 1                     | 27             | tags = 29%, list = 8%,<br>signal = 30%    |
| ssc04130:SNARE<br>interactions in vesicular<br>transport    | 13   | −0.43 | −1.19 | 0.251                | 0.939                | 1                     | 164            | tags = 77%, list = 48%,<br>signal = 141%  |
| ssc03050:Proteasome                                         | 7    | −0.51 | −1.18 | 0.283                | 0.92                 | 1                     | 82             | tags = 43%, list = 24%,<br>signal = 55%   |
| ssc04114:Oocyte meiosis                                     | 9    | −0.49 | −1.18 | 0.28                 | 0.902                | 1                     | 49             | tags = 33%, list = 14%,<br>signal = 38%   |
| ssc04640:Hematopoietic<br>cell lineage                      | 7    | −0.52 | −1.18 | 0.291                | 0.883                | 1                     | 78             | tags = 57%, list = 23%,<br>signal = 72%   |
| ssc00280:Valine, leucine<br>and isoleucine degradation      | 12   | −0.44 | −1.18 | 0.279                | 0.859                | 1                     | 121            | tags = 58%, list = 35%,<br>signal = 87%   |
| ssc04914:Progesterone-medi<br>ated oocyte maturation        | 7    | −0.52 | −1.17 | 0.28                 | 0.847                | 1                     | 46             | tags = 43%, list = 13%,<br>signal = 48%   |
| ssc00903:Limonene and<br>pinene degradation                 | 3    | −0.66 | −1.17 | 0.266                | 0.827                | 1                     | 121            | tags = 100%, list = 35%,<br>signal = 153% |
| ssc00071:Fatty acid<br>metabolism                           | 9    | −0.47 | −1.17 | 0.293                | 0.816                | 1                     | 188            | tags = 100%, list = 55%,<br>signal = 215% |
| ssc00380:Tryptophan<br>metabolism                           | 4    | −0.61 | −1.16 | 0.272                | 0.803                | 1                     | 56             | tags = 50%, list = 16%,<br>signal = 59%   |
| ssc04740:Olfactory<br>transduction                          | 2    | −0.73 | −1.16 | 0.267                | 0.786                | 1                     | 49             | tags = 50%, list = 14%,<br>signal = 58%   |
| ssc00564:Glycerophospholi<br>pid metabolism                 | 5    | −0.57 | −1.16 | 0.313                | 0.778                | 1                     | 114            | tags = 80%, list = 33%,<br>signal = 118%  |
| ssc00561:Glycerolipid<br>metabolism                         | 5    | −0.55 | −1.16 | 0.312                | 0.76                 | 1                     | 8              | tags = 20%, list = 2%,<br>signal = 20%    |
| ssc00980:Metabolism of<br>xenobiotics by cytochrome<br>P450 | 5    | −0.55 | −1.15 | 0.29                 | 0.768                | 1                     | 26             | tags = 40%, list = 8%,<br>signal = 43%    |

Table S4. Cont.

| Pathway                                               | Size | ES    | NES   | NOM<br><i>p</i> -val | FDR<br><i>q</i> -val | FWER<br><i>p</i> -val | Rank<br>At Max | Leading Edge                              |
|-------------------------------------------------------|------|-------|-------|----------------------|----------------------|-----------------------|----------------|-------------------------------------------|
| ssc04916:Melanogenesis                                | 8    | −0.48 | −1.14 | 0.309                | 0.759                | 1                     | 134            | tags = 63%, list = 39%,<br>signal = 100%  |
| ssc04630:Jak-STAT<br>signaling pathway                | 15   | −0.4  | −1.13 | 0.325                | 0.777                | 1                     | 80             | tags = 53%, list = 23%,<br>signal = 66%   |
| ssc00350:Tyrosine<br>metabolism                       | 4    | −0.59 | −1.13 | 0.322                | 0.762                | 1                     | 93             | tags = 75%, list = 27%,<br>signal = 102%  |
| ssc04070:Phosphatidylinosit<br>ol signaling system    | 6    | −0.51 | −1.12 | 0.326                | 0.759                | 1                     | 49             | tags = 50%, list = 14%,<br>signal = 57%   |
| ssc00603:Glycosphingolipid<br>biosynthesis            | 4    | −0.58 | −1.12 | 0.337                | 0.761                | 1                     | 41             | tags = 50%, list = 12%,<br>signal = 56%   |
| ssc04650:Natural killer cell<br>mediated cytotoxicity | 14   | −0.4  | −1.12 | 0.339                | 0.748                | 1                     | 132            | tags = 57%, list = 38%,<br>signal = 89%   |
| ssc00140:Steroid hormone<br>biosynthesis              | 2    | −0.71 | −1.11 | 0.346                | 0.741                | 1                     | 16             | tags = 50%, list = 5%,<br>signal = 52%    |
| ssc00600:Sphingolipid<br>metabolism                   | 2    | −0.7  | −1.1  | 0.346                | 0.746                | 1                     | 107            | tags = 100%, list = 31%,<br>signal = 144% |
| ssc03040:Spliceosome                                  | 8    | −0.48 | −1.1  | 0.368                | 0.749                | 1                     | 109            | tags = 50%, list = 32%,<br>signal = 71%   |
| ssc00010:Glycolysis/<br>Gluconeogenesis               | 9    | −0.45 | −1.09 | 0.385                | 0.744                | 1                     | 67             | tags = 33%, list = 19%,<br>signal = 40%   |
| ssc00190:Oxidative<br>phosphorylation                 | 11   | −0.43 | −1.09 | 0.363                | 0.745                | 1                     | 94             | tags = 36%, list = 27%,<br>signal = 48%   |
| ssc04530:Tight junction                               | 10   | −0.43 | −1.08 | 0.385                | 0.744                | 1                     | 23             | tags = 20%, list = 7%,<br>signal = 21%    |
| ssc01040:Biosynthesis of<br>unsaturated fatty acids   | 2    | −0.67 | −1.08 | 0.367                | 0.737                | 1                     | 116            | tags = 100%, list = 34%,<br>signal = 150% |
| ssc00450:Selenoamino acid<br>metabolism               | 3    | −0.6  | −1.08 | 0.379                | 0.727                | 1                     | 139            | tags = 100%, list = 40%,<br>signal = 166% |
| ssc04210:Apoptosis                                    | 20   | −0.34 | −1.03 | 0.445                | 0.811                | 1                     | 184            | tags = 70%, list = 53%,<br>signal = 142%  |
| ssc00900:Terpenoid<br>backbone biosynthesis           | 2    | −0.65 | −1.03 | 0.442                | 0.803                | 1                     | 124            | tags = 100%, list = 36%,<br>signal = 155% |
| ssc00330:Arginine and<br>proline metabolism           | 7    | −0.44 | −1.02 | 0.441                | 0.804                | 1                     | 131            | tags = 71%, list = 38%,<br>signal = 113%  |
| ssc00360:Phenylalanine<br>metabolism                  | 5    | −0.5  | −1.01 | 0.446                | 0.814                | 1                     | 93             | tags = 60%, list = 27%,<br>signal = 81%   |
| ssc04144:Endocytosis                                  | 13   | −0.37 | −1    | 0.491                | 0.831                | 1                     | 19             | tags = 15%, list = 6%,<br>signal = 16%    |
| ssc05020:Prion diseases                               | 5    | −0.49 | −1    | 0.49                 | 0.822                | 1                     | 25             | tags = 40%, list = 7%,<br>signal = 43%    |
| ssc04540:Gap junction                                 | 8    | −0.42 | −1    | 0.48                 | 0.81                 | 1                     | 20             | tags = 25%, list = 6%,<br>signal = 26%    |

Table S4. Cont.

| Pathway                                              | Size | ES    | NES   | NOM<br><i>p</i> -val | FDR<br><i>q</i> -val | FWER<br><i>p</i> -val | Rank<br>At Max | Leading Edge                              |
|------------------------------------------------------|------|-------|-------|----------------------|----------------------|-----------------------|----------------|-------------------------------------------|
| ssc00020:Citrate cycle<br>(TCA cycle)                | 11   | −0.37 | −0.97 | 0.502                | 0.858                | 1                     | 221            | tags = 100%, list = 64%,<br>signal = 271% |
| ssc05214:Glioma                                      | 14   | −0.35 | −0.97 | 0.513                | 0.845                | 1                     | 49             | tags = 29%, list = 14%,<br>signal = 32%   |
| ssc05223:Non-small cell<br>lung cancer               | 9    | −0.4  | −0.97 | 0.522                | 0.834                | 1                     | 45             | tags = 33%, list = 13%,<br>signal = 37%   |
| ssc00604:Glycosphingolipid<br>biosynthesis           | 2    | −0.61 | −0.97 | 0.538                | 0.823                | 1                     | 135            | tags = 100%, list = 39%,<br>signal = 164% |
| ssc05210:Colorectal cancer                           | 13   | −0.35 | −0.96 | 0.509                | 0.814                | 1                     | 134            | tags = 54%, list = 39%,<br>signal = 85%   |
| ssc00500:Starch and sucrose<br>metabolism            | 4    | −0.51 | −0.96 | 0.544                | 0.818                | 1                     | 60             | tags = 50%, list = 17%,<br>signal = 60%   |
| ssc00511:Other glycan<br>degradation                 | 2    | −0.61 | −0.95 | 0.568                | 0.81                 | 1                     | 135            | tags = 100%, list = 39%,<br>signal = 164% |
| ssc04360:Axon guidance                               | 7    | −0.43 | −0.95 | 0.549                | 0.799                | 1                     | 148            | tags = 71%, list = 43%,<br>signal = 123%  |
| ssc04623:Cytosolic<br>DNA-sensing pathway            | 9    | −0.38 | −0.94 | 0.542                | 0.808                | 1                     | 105            | tags = 44%, list = 31%,<br>signal = 62%   |
| ssc00040:Pentose and<br>glucuronate interconversions | 3    | −0.55 | −0.94 | 0.561                | 0.801                | 1                     | 159            | tags = 100%, list = 46%,<br>signal = 184% |
| ssc04920:Adipocytokine<br>signaling pathway          | 15   | −0.34 | −0.94 | 0.538                | 0.792                | 1                     | 140            | tags = 73%, list = 41%,<br>signal = 118%  |
| ssc00340:Histidine<br>metabolism                     | 4    | −0.48 | −0.93 | 0.569                | 0.802                | 1                     | 56             | tags = 50%, list = 16%,<br>signal = 59%   |
| ssc00591:Linoleic acid<br>metabolism                 | 2    | −0.6  | −0.93 | 0.583                | 0.791                | 1                     | 16             | tags = 50%, list = 5%,<br>signal = 52%    |
| ssc05213:Endometrial<br>cancer                       | 12   | −0.35 | −0.93 | 0.565                | 0.785                | 1                     | 45             | tags = 25%, list = 13%,<br>signal = 28%   |
| ssc00982:Drug metabolism                             | 8    | −0.39 | −0.92 | 0.575                | 0.79                 | 1                     | 16             | tags = 25%, list = 5%,<br>signal = 26%    |
| ssc00830:Retinol<br>metabolism                       | 3    | −0.52 | −0.92 | 0.608                | 0.782                | 1                     | 38             | tags = 67%, list = 11%,<br>signal = 74%   |
| ssc00531:Glycosaminoglyca<br>n degradation           | 3    | −0.52 | −0.91 | 0.604                | 0.786                | 1                     | 135            | tags = 67%, list = 39%,<br>signal = 109%  |
| ssc05014:Amyotrophic<br>lateral sclerosis (ALS)      | 10   | −0.36 | −0.9  | 0.576                | 0.789                | 1                     | 186            | tags = 80%, list = 54%,<br>signal = 169%  |
| ssc04310:Wnt signaling<br>pathway                    | 15   | −0.32 | −0.89 | 0.615                | 0.789                | 1                     | 64             | tags = 27%, list = 19%,<br>signal = 31%   |
| ssc04062:Chemokine<br>signaling pathway              | 18   | −0.3  | −0.88 | 0.644                | 0.807                | 1                     | 134            | tags = 61%, list = 39%,<br>signal = 95%   |
| ssc04150:mTOR signaling<br>pathway                   | 6    | −0.4  | −0.86 | 0.648                | 0.824                | 1                     | 45             | tags = 33%, list = 13%,<br>signal = 38%   |

Table S4. Cont.

| Pathway                                                            | Size | ES    | NES   | NOM<br><i>p</i> -val | FDR<br><i>q</i> -val | FWER<br><i>p</i> -val | Rank<br>At Max | Leading Edge                              |
|--------------------------------------------------------------------|------|-------|-------|----------------------|----------------------|-----------------------|----------------|-------------------------------------------|
| ssc04110:Cell cycle                                                | 14   | −0.31 | −0.86 | 0.643                | 0.817                | 1                     | 138            | tags = 57%, list = 40%,<br>signal = 92%   |
| ssc00270:Cysteine and<br>methionine metabolism                     | 5    | −0.42 | −0.85 | 0.666                | 0.816                | 1                     | 171            | tags = 80%, list = 50%,<br>signal = 157%  |
| ssc05218:Melanoma                                                  | 11   | −0.32 | −0.83 | 0.689                | 0.845                | 1                     | 45             | tags = 27%, list = 13%,<br>signal = 30%   |
| ssc04620:Toll-like receptor<br>signaling pathway                   | 17   | −0.28 | −0.83 | 0.701                | 0.835                | 1                     | 65             | tags = 29%, list = 19%,<br>signal = 34%   |
| ssc05332:Graft-versus-host<br>disease                              | 10   | −0.33 | −0.82 | 0.69                 | 0.835                | 1                     | 31             | tags = 20%, list = 9%,<br>signal = 21%    |
| ssc04670:Leukocyte<br>transendothelial migration                   | 11   | −0.32 | −0.82 | 0.702                | 0.829                | 1                     | 119            | tags = 45%, list = 35%,<br>signal = 67%   |
| ssc00052:Galactose<br>metabolism                                   | 3    | −0.46 | −0.82 | 0.726                | 0.821                | 1                     | 159            | tags = 67%, list = 46%,<br>signal = 123%  |
| ssc05219:Bladder cancer                                            | 8    | −0.35 | −0.81 | 0.718                | 0.823                | 1                     | 35             | tags = 25%, list = 10%,<br>signal = 27%   |
| ssc00400:Phenylalanine,<br>tyrosine and tryptophan<br>biosynthesis | 2    | −0.51 | −0.8  | 0.776                | 0.828                | 1                     | 171            | tags = 100%, list = 50%,<br>signal = 198% |
| ssc04120:Ubiquitin<br>mediated proteolysis                         | 9    | −0.31 | −0.79 | 0.729                | 0.838                | 1                     | 158            | tags = 56%, list = 46%,<br>signal = 100%  |
| ssc00590:Arachidonic acid<br>metabolism                            | 5    | −0.38 | −0.78 | 0.772                | 0.84                 | 1                     | 15             | tags = 20%, list = 4%,<br>signal = 21%    |
| ssc04666:Fc gamma<br>R-mediated phagocytosis                       | 7    | −0.33 | −0.77 | 0.772                | 0.847                | 1                     | 77             | tags = 29%, list = 22%,<br>signal = 36%   |
| ssc00510:N-Glycan<br>biosynthesis                                  | 6    | −0.35 | −0.76 | 0.781                | 0.85                 | 1                     | 228            | tags = 100%, list = 66%,<br>signal = 291% |
| ssc04930:Type II diabetes<br>mellitus                              | 6    | −0.35 | −0.74 | 0.801                | 0.863                | 1                     | 45             | tags = 33%, list = 13%,<br>signal = 38%   |
| ssc05016:HuntinTGon's<br>disease                                   | 18   | −0.24 | −0.71 | 0.833                | 0.892                | 1                     | 181            | tags = 61%, list = 53%,<br>signal = 122%  |
| ssc04115:p53 signaling<br>pathway                                  | 14   | −0.25 | −0.69 | 0.847                | 0.896                | 1                     | 182            | tags = 71%, list = 53%,<br>signal = 146%  |
| ssc00770:Pantothenate and<br>CoA biosynthesis                      | 2    | −0.44 | −0.69 | 0.91                 | 0.895                | 1                     | 95             | tags = 50%, list = 28%,<br>signal = 69%   |
| ssc00630:Glyoxylate and<br>dicarboxylate metabolism                | 3    | −0.36 | −0.64 | 0.924                | 0.927                | 1                     | 221            | tags = 100%, list = 64%,<br>signal = 277% |
| ssc00030:Pentose phosphate<br>pathway                              | 2    | −0.4  | −0.62 | 0.957                | 0.935                | 1                     | 53             | tags = 50%, list = 15%,<br>signal = 59%   |
| ssc04622:RIG-I-like<br>receptor signaling pathway                  | 14   | −0.22 | −0.62 | 0.917                | 0.929                | 1                     | 145            | tags = 57%, list = 42%,<br>signal = 95%   |
| ssc00601:Glycosphingolipid<br>biosynthesis                         | 2    | −0.31 | −0.49 | 1                    | 0.983                | 1                     | 101            | tags = 50%, list = 29%,<br>signal = 70%   |

**Table S5.** Pathways enriched in phenotype CG.

| Pathways                                                              | Size | ES   | NES  | NOM<br><i>p</i> -val | FDR<br><i>q</i> -val | FWER<br><i>p</i> -val | Rank<br>at Max | Leading Edge                              |
|-----------------------------------------------------------------------|------|------|------|----------------------|----------------------|-----------------------|----------------|-------------------------------------------|
| ssc03010:Ribosome                                                     | 7    | 0.68 | 1.79 | 0.009                | 0.358                | 0.355                 | 114            | tags = 100%, list = 33%,<br>signal = 147% |
| ssc05310:Asthma                                                       | 7    | 0.66 | 1.73 | 0.027                | 0.284                | 0.521                 | 68             | tags = 86%, list = 20%,<br>signal = 105%  |
| ssc05330:Allograft rejection                                          | 11   | 0.54 | 1.7  | 0.025                | 0.221                | 0.575                 | 80             | tags = 82%, list = 23%,<br>signal = 103%  |
| ssc04940:Type I diabetes<br>mellitus                                  | 10   | 0.52 | 1.6  | 0.036                | 0.307                | 0.784                 | 80             | tags = 80%, list = 23%,<br>signal = 101%  |
| ssc04260:Cardiac muscle<br>contraction                                | 6    | 0.63 | 1.6  | 0.039                | 0.25                 | 0.791                 | 53             | tags = 50%, list = 15%,<br>signal = 58%   |
| ssc05320:Autoimmune thyroid<br>disease                                | 9    | 0.53 | 1.53 | 0.074                | 0.309                | 0.908                 | 80             | tags = 89%, list = 23%,<br>signal = 113%  |
| ssc04060:Cytokine-cytokine<br>receptor interaction                    | 12   | 0.43 | 1.45 | 0.084                | 0.42                 | 0.978                 | 61             | tags = 58%, list = 18%,<br>signal = 68%   |
| ssc04672:Intestinal immune<br>network for IgA production              | 9    | 0.48 | 1.41 | 0.108                | 0.451                | 0.994                 | 68             | tags = 78%, list = 20%,<br>signal = 94%   |
| ssc00230:Purine metabolism                                            | 4    | 0.66 | 1.39 | 0.094                | 0.434                | 0.995                 | 28             | tags = 50%, list = 8%,<br>signal = 54%    |
| ssc02010:ABC transporters                                             | 2    | 0.81 | 1.34 | 0.139                | 0.513                | 0.997                 | 66             | tags = 100%, list = 19%,<br>signal = 123% |
| ssc05412:Arrhythmogenic<br>right ventricular<br>cardiomyopathy (ARVC) | 2    | 0.77 | 1.25 | 0.21                 | 0.692                | 1                     | 26             | tags = 50%, list = 8%,<br>signal = 54%    |
| ssc05322:Systemic lupus<br>erythematosus                              | 12   | 0.36 | 1.17 | 0.265                | 0.845                | 1                     | 68             | tags = 58%, list = 20%,<br>signal = 70%   |
| ssc04612:Antigen processing<br>and presentation                       | 17   | 0.31 | 1.16 | 0.243                | 0.791                | 1                     | 85             | tags = 65%, list = 25%,<br>signal = 82%   |
| ssc05414:Dilated<br>cardiomyopathy                                    | 6    | 0.45 | 1.15 | 0.282                | 0.777                | 1                     | 29             | tags = 33%, list = 8%,<br>signal = 36%    |
| ssc04340:Hedgehog signaling<br>pathway                                | 4    | 0.52 | 1.14 | 0.278                | 0.737                | 1                     | 31             | tags = 50%, list = 9%,<br>signal = 54%    |
| ssc04512:ECM-receptor<br>interaction                                  | 3    | 0.55 | 1.07 | 0.364                | 0.859                | 1                     | 23             | tags = 67%, list = 7%,<br>signal = 71%    |
| ssc00240:Pyrimidine<br>metabolism                                     | 3    | 0.54 | 1.03 | 0.42                 | 0.905                | 1                     | 158            | tags = 100%, list = 46%,<br>signal = 183% |
| ssc04730:Long-term<br>depression                                      | 5    | 0.44 | 1.03 | 0.392                | 0.855                | 1                     | 0              | tags = 20%, list = 0%,<br>signal = 20%    |
| ssc04514:Cell adhesion<br>molecules (CAMs)                            | 16   | 0.28 | 1.01 | 0.411                | 0.861                | 1                     | 80             | tags = 56%, list = 23%,<br>signal = 70%   |
| ssc00760:Nicotinate and<br>nicotinamide metabolism                    | 2    | 0.61 | 1    | 0.465                | 0.849                | 1                     | 134            | tags = 100%, list = 39%,<br>signal = 163% |
| ssc04350:TGF-beta signaling<br>pathway                                | 14   | 0.28 | 0.96 | 0.465                | 0.901                | 1                     | 67             | tags = 36%, list = 19%,<br>signal = 43%   |

Table S5. Cont.

| Pathways                                                | Size | ES   | NES  | NOM<br><i>p</i> -val | FDR<br><i>q</i> -val | FWER<br><i>p</i> -val | Rank<br>at Max | Leading Edge                              |
|---------------------------------------------------------|------|------|------|----------------------|----------------------|-----------------------|----------------|-------------------------------------------|
| ssc05012:Parkinson's disease                            | 12   | 0.28 | 0.94 | 0.528                | 0.904                | 1                     | 251            | tags = 100%, list = 73%,<br>signal = 357% |
| ssc00562:Inositol phosphate<br>metabolism               | 4    | 0.44 | 0.94 | 0.513                | 0.878                | 1                     | 8              | tags = 25%, list = 2%,<br>signal = 25%    |
| ssc00250:Alanine, aspartate<br>and glutamate metabolism | 5    | 0.39 | 0.93 | 0.541                | 0.864                | 1                     | 16             | tags = 40%, list = 5%,<br>signal = 41%    |
| ssc04130:SNARE interactions<br>in vesicular transport   | 2    | 0.55 | 0.91 | 0.564                | 0.859                | 1                     | 156            | tags = 100%, list = 45%,<br>signal = 182% |
| ssc04140:Regulation of<br>autophagy                     | 2    | 0.54 | 0.9  | 0.583                | 0.86                 | 1                     | 14             | tags = 50%, list = 4%,<br>signal = 52%    |
| ssc00062:Fatty acid elongation<br>in mitochondria       | 2    | 0.53 | 0.87 | 0.633                | 0.877                | 1                     | 162            | tags = 100%, list = 47%,<br>signal = 188% |
| ssc05217:Basal cell carcinoma                           | 6    | 0.34 | 0.87 | 0.605                | 0.846                | 1                     | 31             | tags = 33%, list = 9%,<br>signal = 36%    |
| ssc00983:Drug metabolism                                | 3    | 0.45 | 0.87 | 0.639                | 0.829                | 1                     | 4              | tags = 33%, list = 1%,<br>signal = 33%    |
| ssc05416:Viral myocarditis                              | 15   | 0.24 | 0.84 | 0.636                | 0.842                | 1                     | 80             | tags = 53%, list = 23%,<br>signal = 66%   |
| ssc05410:Hypertrophic<br>cardiomyopathy (HCM)           | 8    | 0.3  | 0.82 | 0.72                 | 0.847                | 1                     | 26             | tags = 25%, list = 8%,<br>signal = 26%    |
| ssc04520:Adherens junction                              | 10   | 0.27 | 0.82 | 0.675                | 0.826                | 1                     | 44             | tags = 30%, list = 13%,<br>signal = 33%   |
| ssc04960:Aldosterone-regulate<br>d sodium reabsorption  | 3    | 0.42 | 0.8  | 0.722                | 0.833                | 1                     | 13             | tags = 33%, list = 4%,<br>signal = 34%    |
| ssc00480:Glutathione<br>metabolism                      | 8    | 0.28 | 0.8  | 0.731                | 0.812                | 1                     | 18             | tags = 25%, list = 5%,<br>signal = 26%    |
| ssc05340:Primary<br>immunodeficiency                    | 3    | 0.41 | 0.79 | 0.766                | 0.81                 | 1                     | 61             | tags = 67%, list = 18%,<br>signal = 80%   |
| ssc03020:RNA polymerase                                 | 13   | 0.22 | 0.77 | 0.769                | 0.81                 | 1                     | 25             | tags = 15%, list = 7%,<br>signal = 16%    |
| ssc04320:Dorso-ventral axis<br>formation                | 2    | 0.38 | 0.6  | 0.973                | 0.97                 | 1                     | 213            | tags = 100%, list = 62%,<br>signal = 261% |
| ssc00051:Fructose and<br>mannose metabolism             | 4    | 0.26 | 0.57 | 0.955                | 0.962                | 1                     | 32             | tags = 25%, list = 9%,<br>signal = 27%    |
